# Supplementary material for: Hierarchical porous carbonaceous materials via ionothermal carbonization of carbohydrates
Source: Royal Society of Chemistry journal article supplement (doi:10.1039/c1jm00013f), 2011-01-01
Supplement: c1jm00013f.pdf [file c1jm00013f.pdf]

## ***Hierarchical Porous Carbonaceous Materials via Ionothermal Carbonization of Carbohydrates***

By Zai-Lai Xie<sup>1</sup>, Robin J. White<sup>2</sup>, Jens Weber<sup>2</sup>, Andreas Taubert<sup>1,2,\*</sup> and Magdalena M Titirici<sup>2\*</sup>

1. Institute of Chemistry, University of Potsdam, 14476 Potsdam
2. Max-Planck-Institute of Colloids and Interfaces, D-14476 Golm.

### **Supplementary Materials**

**Table S1:** Macropore information obtained from Hg intrusion measurement.

| <b><i>Samples</i></b> | <b><i>Specific area</i></b><br><b><i>[m<sup>2</sup> g<sup>-1</sup>]</i></b> | <b><i>Total porosity</i></b><br><b><i>[%]</i></b> | <b><i><math>\rho_{density}</math></i></b><br><b><i>[g cm<sup>-3</sup>]</i></b> |
|-----------------------|-----------------------------------------------------------------------------|---------------------------------------------------|--------------------------------------------------------------------------------|
| C-Glucose             | 76.1                                                                        | 92.4                                              | 0.11                                                                           |
| C-Fructose            | 27.3                                                                        | 48.9                                              | 0.57                                                                           |
| C-Xylose              | 76.6                                                                        | 83.2                                              | 0.30                                                                           |
| C-Starch              | 52.3                                                                        | 60.6                                              | 0.44                                                                           |

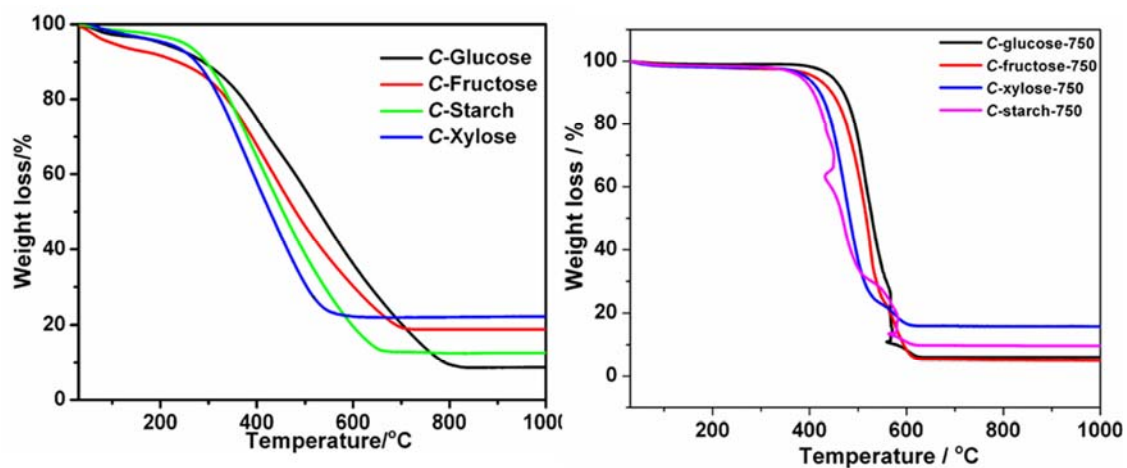

**Fig S1.** TGA curves of (A): all ionothermal carbons at N<sub>2</sub> atmosphere; (B) all post-carbonized materials at O<sub>2</sub> atmosphere.

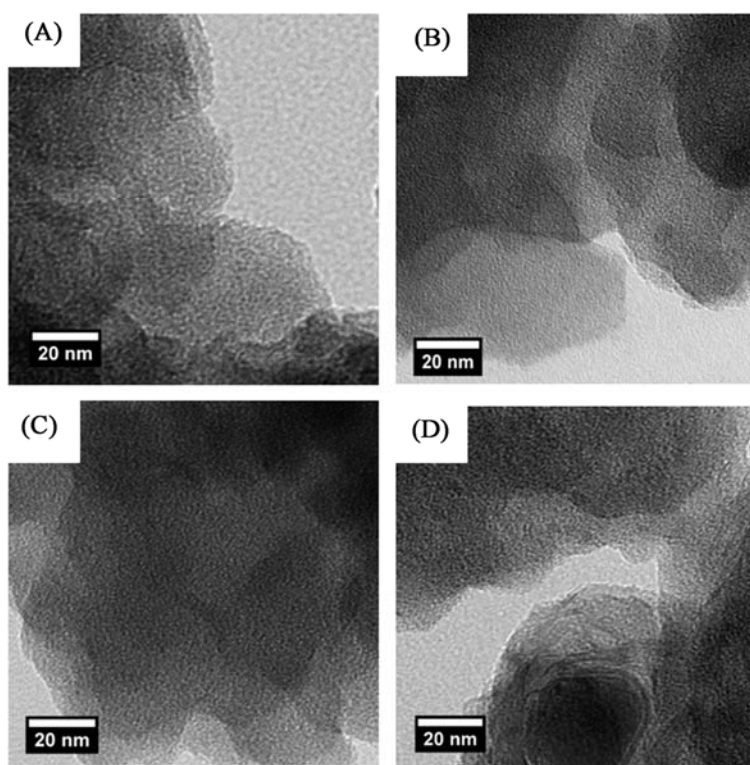

**Figure S2:** TEM micrographs of carbon materials after carbonization at 750 °C under N<sub>2</sub>; (A) C-Glucose, (B) C-Fructose, (C) C-Xylose and (D) C-Starch.

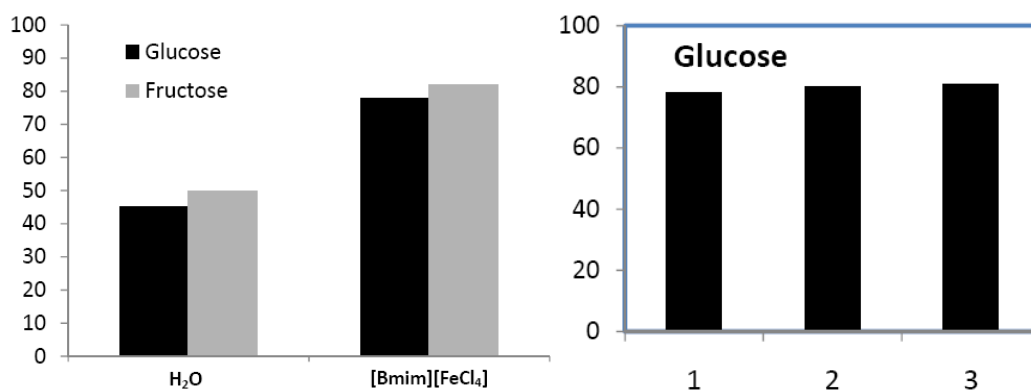

**Figure S3.** Yield of glucose and fructose to carbon in H<sub>2</sub>O and [Bmim][FeCl<sub>4</sub>] (Left) and the results of recycling of [Bmim][FeCl<sub>4</sub>] for D-Glucose (right). A comparative experiment using the IL without Fe ([Bmim]Cl) was also tried for Glucose. The yield based on carbon is 50%.

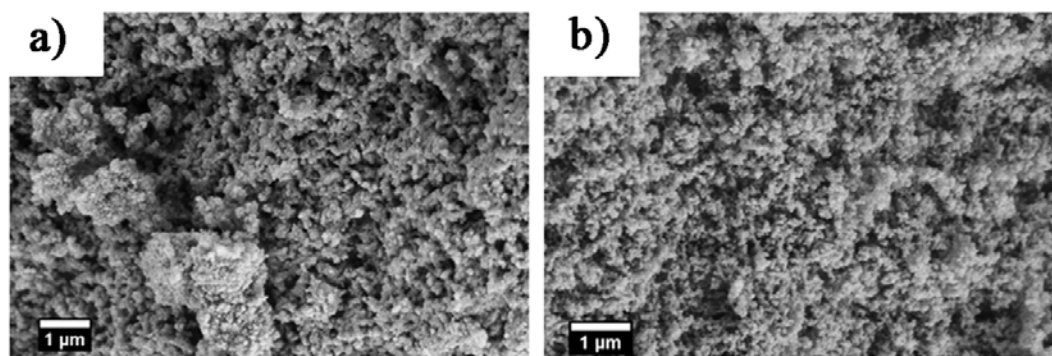

**Figure S4.** SEM micrographs of carbon materials from fructose. (a) 1st run, (b) 2nd run.

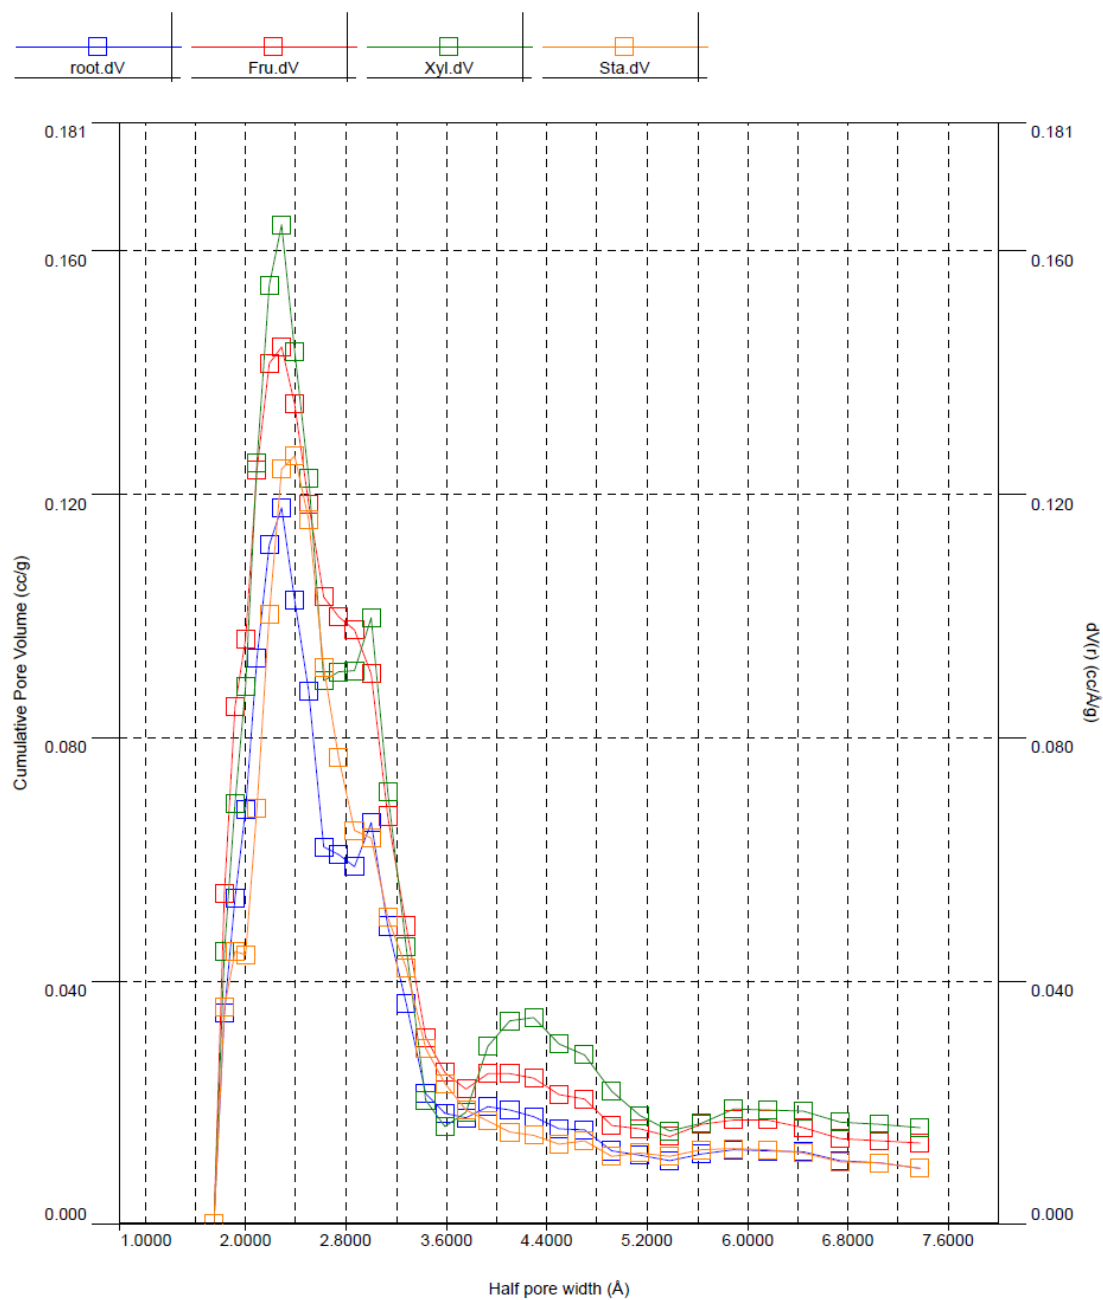

**Figure S5.** PSD of the post carbonized materials, extracted from CO<sub>2</sub> adsorption isotherms (@273K) by the GCMC model; blue: C-Glucose-750; red: C-Fructose-750; red: C-Xylose-750; orange: C-Starch-750;
